# Supplementary material for: Identification and characterization of satellite DNAs in two-toed sloths of the genus Choloepus (Megalonychidae, Xenarthra)
Source: PubMed Central journal article supplement (PMC7644632; doi:10.1038/s41598-020-76199-8), 2020-11-05
Supplement: 41598_2020_76199_MOESM1_ESM.pdf [file 41598_2020_76199_MOESM1_ESM.pdf]

## Supplementary Information for

### Identification and characterization of satellite DNAs in two-toed sloths of the genus *Choloepus* (Megalonychidae, Xenarthra)

Radarane Santos Sena<sup>1</sup>; Pedro Heringer<sup>1</sup>; Mirela Pelizaro Valeri<sup>1</sup>; Valéria do Socorro Pereira<sup>2</sup>; Gustavo C.S. Kuhn<sup>1</sup>; Marta Svartman<sup>1\*</sup>

<sup>1</sup>Laboratório de Citogenômica Evolutiva, Departamento de Genética, Ecologia e Evolução, Instituto de Ciências Biológicas, Universidade Federal de Minas Gerais, Belo Horizonte, MG, Brazil

<sup>2</sup>Fundação de Parques Municipais e Zoobotânica, Belo Horizonte, MG, Brazil

Running Title: Satellite DNAs of two-toed sloths

\*Corresponding author

E-mail: svartmanm@ufmg.br

Telephone number: 5531-34092612

Fax number: 5531-34092568

### Supplementary Data1:

>SATC01

GAAAGCAGTATGTTACACAGTTCTGAAAACCTAAGTTCAATACAGCTTTCATTGACTTCCATGTG  
TCTTCCCTGGGCTGAAAAACAACTTTTTTGAAAGCAGTCACGTGGGACTCTGC

### Supplementary Data2:

>SATC02

TGGCCTGTGCAGTCAGGAGTAGGCATATGAGGATGATTCTGCAGCCCTGAGGATGACATGCCCC  
CGGGTGGTTGGTGAGATTTTTGACTCTCCCGTTAGTGCGCTGCACTGGTATGCCCGAGGGCAAC  
TTCCAGTGGGTTGTGGGCTAGGCCGAGGCTTAGTGAAGTGCCCTGCCCTCGCTTGGGCCTGCC  
ATTTCTTTTCCAATGGCACTGATATTACCAGTGGATCGTAGACATGCAGCCTAGCACCCGAATC  
TCACTTAGGAGAGCTCACCGTGAGGCATGCCCATGTTTCAGTCAATGAACACTCTAGAAGTCAGG  
GAAATTGGGACAACCTGTGACGTGTCTGTCTCTCCACTGTTTATACCCGGCATGATGATTGGTT  
CATGGCTCCCTTAATCGTGGGATTTCTTGCTCTATTGGTGCTTGCCGGATCTCTCCTTCTGGGA  
CTAAAGGCAGAGTGATAACCAAGGTGGTCCCCTGATGCAGAGACCACATGACATGTGGACAGGC  
TGATGTTTTCTGGGTTGAGATTGCTGCAGGCACGGTTGTGGACAGGGACGGAGACTCCCAGAGG  
GCCGGCACGAAGGTGGACACTGAATATTTTTCTTGCTCTTTCCAGTCATTTCCATTGCCATTAG  
GGAATTCCTGTTCTGGGAGCCAACATACTCTGGCTCTGTCATTGAGTGTGATCCACAAGGAAC  
TGTAAGGATCACCCCGAGTCCCCCTCTGACCTGCTGCTGGGCATGGCAGAGATTTACCACAGG  
CGTGGCCCCCTGAACCTGTTCCACATCTGAAAGAAGATTTTCAGCAAAGGGAGAGTTCTCCCCGAA  
GAATTTAGTTTCTGAATTTGCTGATGCTCAAGGGAGTATGCCCAAGTGGAACCTGACTGTGACAA  
TTCTTCTCCTATCCCATGAAAGCAGGTCAGTGTAATCTCACCCGGATCTGAACCTAGGCCTTCA  
TAAGGATGGAAGCCAACACTTAGGAAGTGTGTGTTTATATAATTCATTTCTTCCCGTGTAAAC  
ATTGTTTTACATTCCTTGTATTTAAAGGTGCTTTTAAAGAACTGGACATTTGTGAGTAAAAGAA  
TGTCATTTTCTTTAGTTATTCTTGTGTTGATTTCCCTTCCAAACAGAGACGTTCTCTTAGGTATT  
CACTGGAACATTACCACAATCTTTAAATTTACCTGGTTCGTAGTACAAATATGTGCGCTAGGGAC  
CTGGTCCACACCTCAACAATTAGCCACTCATGACCTATAGACCAAGCAAATGTTAATGGCAGT  
AATAATGTGAGAAATATAGAACGGAAAAACAAGACAGAGTGTAGGTCTCACGTGAAACATTC  
CGTTTTCTTCCAGGTGATTTATTCTCTTTCCCGTGAATATACATCAATTTATTTCCCTCACCTGT  
ATAAATTAGAAAACCTGCTGAACCATCTTTAAAAACTATTTCCCAAATTTCTGTTTTATTTCAGAGA  
TTCTTCTCCTGCTGATATTGACTTTATGAGCTTGAGGTGAGATAGGCCGATAATTATTTTGCCCGC  
ACTGCGGTTATTTTTTAAATGAAAAGTTTAAATTTTGTCTTTTCCAGTCTATTGAATTCATTAT  
ACATATTCTCTGTAAGCTACAAAACACACAAACATCAAAAAGTCAAAACTTTTCATTAAGCA  
AAGCAGAGTTTAAAGAAAAGCAAATAACCTATAGTAACTACTTTGCTTCCCTCATTGCTCAAGTTT  
GCATTCATGTGTTATCTTCAAGGCATTTGTTTAAAGATTTCTAATATTATAAACAATACTCGTC  
CTACAGTCCATTTAGTTCCCTTTTGGGTACTTTTTCTTGCTGCACAGACCTGTTTCCCTTTTCCG  
TCTCTTGTCATCTAGTTACAGTAACACTGCTTCAAACCCCCGTATCCAGTTTCAGATAGAGGCT  
TTTCTGCTTTGCCTAGTGTGCAGACTCAGCTAAAGAGCAGGGAATGTGTTACTGAATTTTTCCC  
CTTACCCACGGAGAAGTCGAAGTGCCACGCTGTGCCCAATAGGCGGCAGGAAATCCCAAGTTA  
ACAAAAGTCAGTGAAAATTTCCACTGGGGCTCGAACCGGTGGAGGAGACAGCGTCAGCACAGG  
CTCCAAAGCGGTTTAGAATTTCTAGCAGGGCTCGGAATGCGCATGCGCAAACGACGCTGTACCT  
CATCTGTGTCCCAAAGGAATCTGGTTCCCTAAGCAACAGACCTTAGCCCAACGGCTGCCCTGTG  
GTCTGAACATGTAAGGGGCTCCCCAAGTGTGCAGGTCACGGTGGAGGTGTTG

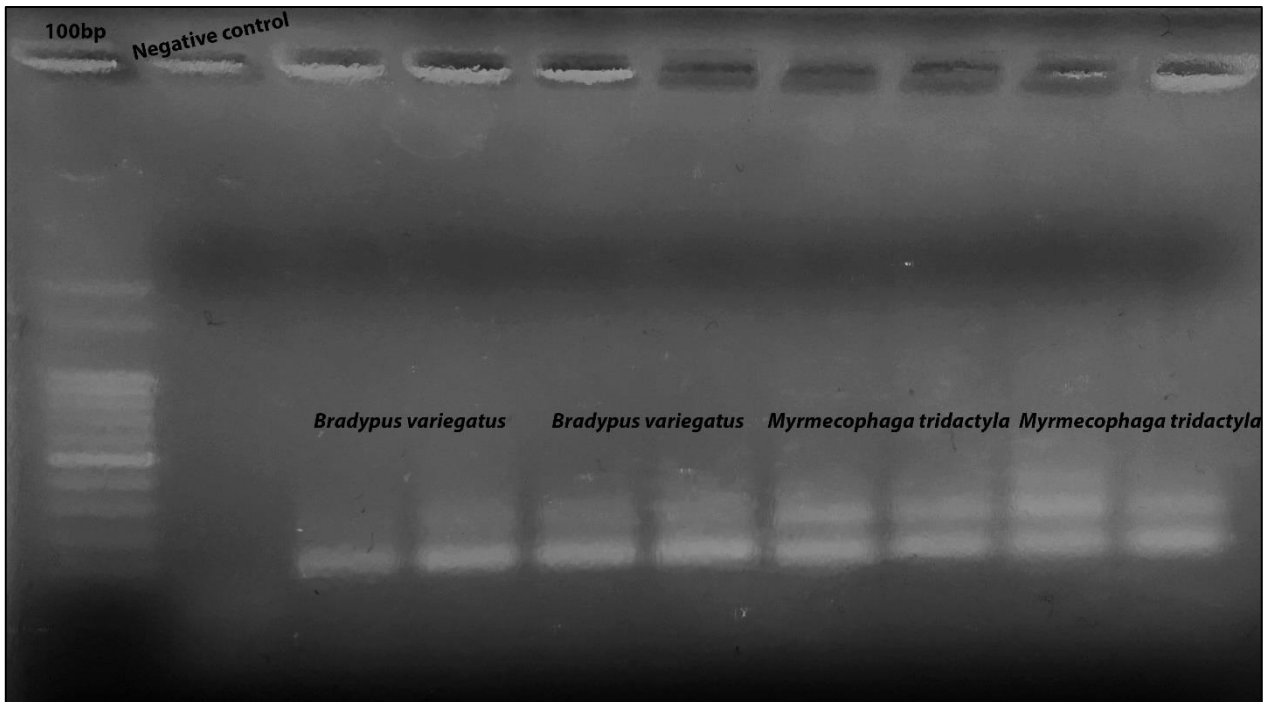

**Supplementary Figure 1.** Uncropped agarose gel of PCR products from SATCHO1 amplified on genomic DNAs of *Bradypos variegatus* and *Myrmecophaga tridactyla*.

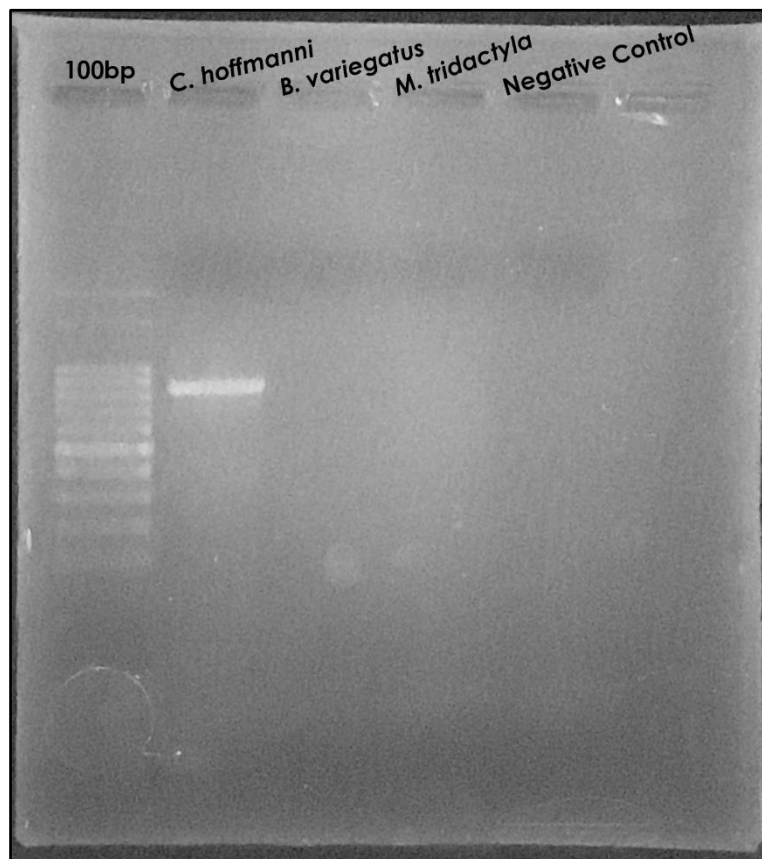

**Supplementary Figure 2.** Uncropped agarose gel of PCR products from SATCHO2 amplified on genomic DNAs of *Choloepus hoffmanni*, *Bradypos variegatus* and *Myrmecophaga tridactyla*.
